# Supplementary material for: Colorimetric and ratiometric supramolecular AIE fluorescent probe for the on-site monitoring of fipronil
Source: Royal Society of Chemistry journal article supplement (doi:10.1039/d3an01333b), 2023-01-01
Supplement: d3an01333b1.pdf [file d3an01333b1.pdf]

## Supporting Information

### **Colorimetric and ratiometric supramolecular AIE fluorescent probe for on-site monitoring fipronil**

**Junxu Ge,<sup>a</sup> Li-Juan Wang,<sup>b</sup> Xiu Pan,<sup>b</sup> Chungu Zhang,<sup>b</sup> Ming-Yu Wu,<sup>\*b</sup> Shun Feng<sup>\*b</sup>**

<sup>a</sup>School of Intelligent Manufacturing and Electronic Engineering, Wenzhou  
University of Technology, Wenzhou, Zhejiang, 325000, China

<sup>b</sup>Sichuan Engineering Research Center for Biomimetic Synthesis of Natural Drugs,  
School of Life Science and Engineering, Southwest Jiaotong University, Chengdu  
610031, China

\*Corresponding author

E-mail: [wumy1050hx@swjtu.edu.cn](mailto:wumy1050hx@swjtu.edu.cn) (M.-Y. Wu), [fengshunxd@hotmail.com](mailto:fengshunxd@hotmail.com) (S. Feng)

## **1. Materials and instruments**

All chemical reagents were obtained from J&K Scientific and were used without further purification. Fluorescence spectra were obtained using a Horiba Duetta spectrofluorimeter with a 10 mm quartz cuvette. UV-vis absorption spectra were recorded on a UV-1800 UV-Visible spectrophotometer. Dynamic light scattering (DLS) experiments were studied on a Nano Size Particle Analyzer equipped with (ZEN 3600 MALVERN). The fluorescent images were captured on a camera. The RGB values were determined by the ImageJ software.

## 2. Supplementary figures

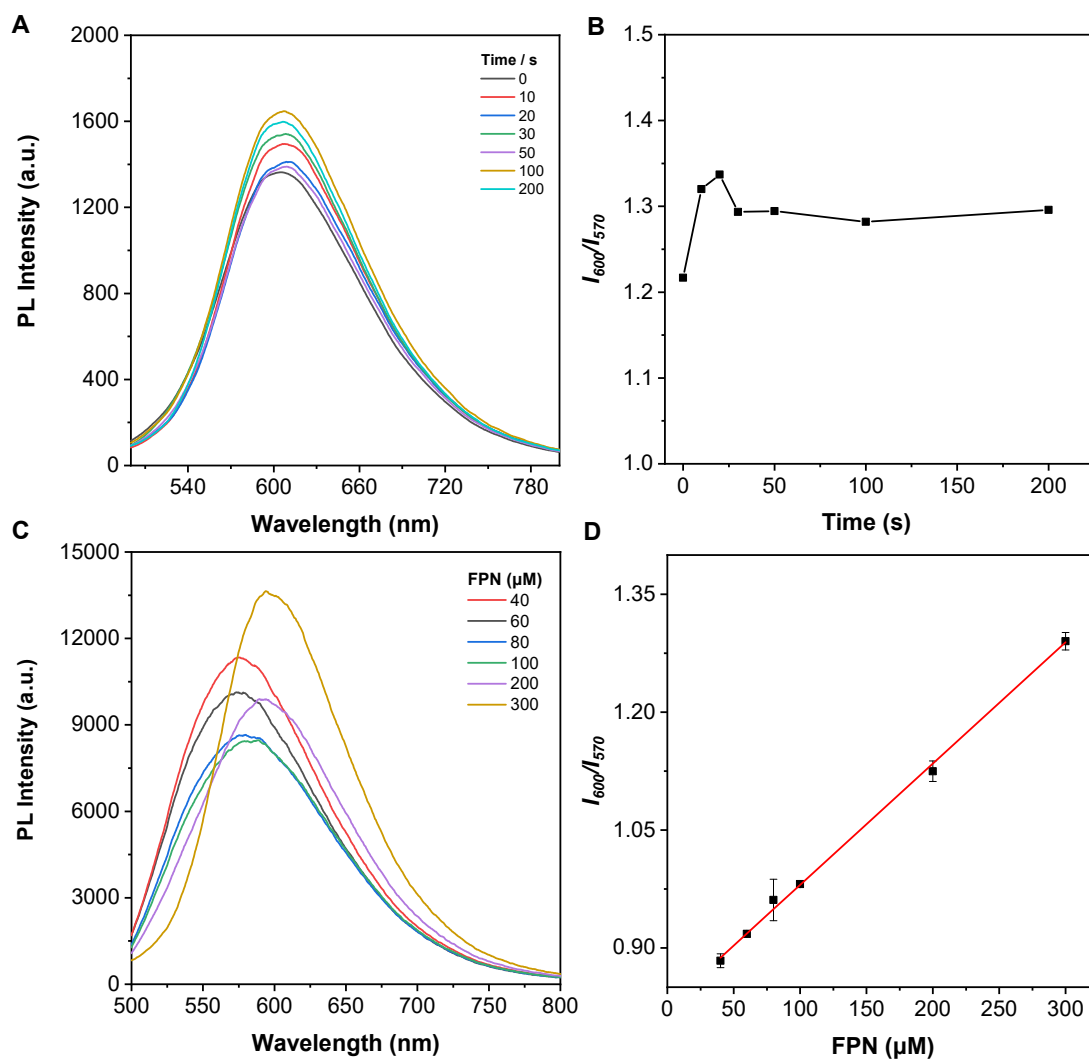

**Fig. S1** The time-dependent changes in (A) fluorescence spectra and (B) intensity ratio ( $I_{600}/I_{570}$ ) of LIQ-TPA-TZ@HSA in the presence of FPN (500  $\mu\text{M}$ ) in PBS buffer. The concentration-dependent changes in (C) fluorescent spectra and (D) intensity ratio ( $I_{600}/I_{570}$ ) of LIQ-TPA-TZ@HSA titrated by different concentrations of FPN (40-300  $\mu\text{M}$ ) in PBS buffer.

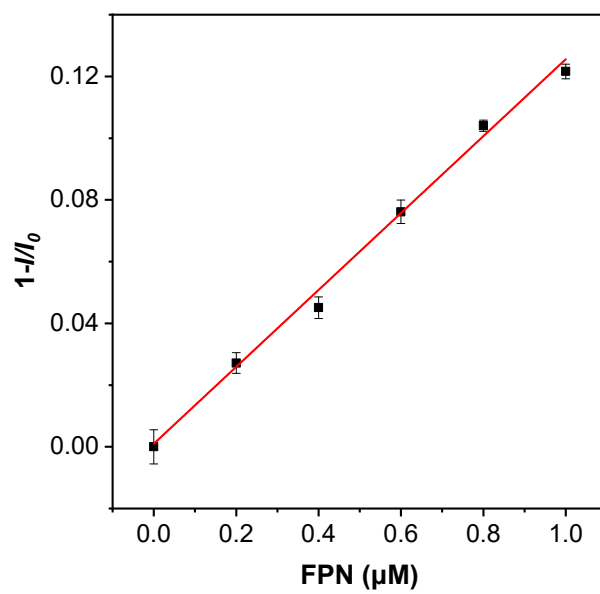

**Fig. S2** The fluorescent titration spectra of LIQ-TPA-TZ@HSA with FPN concentration from 0 to 1  $\mu\text{M}$ .
